# An Increased Incidence of Overt Hypothyroidism after Iodine Fortification of Salt in Denmark: A Prospective Population Study

Inge Bülow Pedersen, Peter Laurberg, Nils Knudsen, Torben Jørgensen, Hans Perrild, Lars Ovesen, and Lone Banke Rasmussen

Department of Endocrinology and Medicine (I.B.P., P.L.), Aalborg Hospital, Aarhus University Hospital, DK-9000 Aalborg, Denmark; Endocrine Unit, Medical Clinic I (N.K., H.P.), Bispebjerg Hospital, DK-2400 Copenhagen, Denmark; Research Centre for Prevention and Health (N.K., T.J.), Glostrup University Hospital, DK-2600 Glostrup, Denmark; The National Heart Foundation (L.O.), DK-1127 Copenhagen, Denmark; and Department of Nutrition (L.B.R.), National Food Institute, DK-2860 Søborg, Denmark

**Context:** Iodine fortification (IF) of salt was introduced in Denmark in 1998. Little is known about the effect of a minor increase in iodine intake on the incidence of hypothyroidism. We prospectively identified all new cases of overt hypothyroidism in two areas of Denmark before and for the first 7 yr after IF had been introduced.

**Methods:** A computer-based register was used to identify continuously all new cases of overt hypothyroidism in two subcohorts with previous moderate and mild iodine deficiency (ID), respectively (Aalborg,  $n = 310,124$ , urinary iodine =  $45 \mu\text{g/liter}$ ; and Copenhagen,  $n = 225,707$ , urinary iodine =  $61 \mu\text{g/liter}$ ). Data were obtained 1) before IF (1997–1998), 2) during voluntary IF (1999–2000), 3) during early IF (2001–2002) and 4) during late (2003–2005) period with mandatory IF.

**Results:** The overall incidence rate of hypothyroidism increased during the study period: baseline,  $38.3/100,000\text{-yr}$ ; voluntary IF,  $43.7$  (not significant *vs.* baseline); early mandatory IF,  $48.7$  (*vs.* baseline, rate ratio (RR) =  $1.27$ ; 95% confidence interval (CI) =  $1.10\text{--}1.47$ ); and late mandatory IF,  $47.2$  (*vs.* baseline, RR =  $1.23$ ; 95% CI =  $1.07\text{--}1.42$ ). There was a geographic difference because hypothyroidism increased only in the area with previous moderate ID: Aalborg, late mandatory IF *vs.* baseline,  $40.3/29.7$  (RR =  $1.11$ ; 95% CI =  $1.11\text{--}1.66$ ); Copenhagen,  $56.7/51.6$  (RR =  $1.10$ ; 95% CI =  $0.90\text{--}1.34$ ). The increase occurred in young and middle-aged adults.

**Conclusion:** Even a cautious iodization of salt was accompanied by a moderate increase in the incidence rate of overt hypothyroidism. This occurred primarily in young and middle-aged subjects with previous moderate ID. (*J Clin Endocrinol Metab* 92: 3122–3127, 2007)

GLOBALLY, ABOUT ONE THIRD of the world's population lives in areas with risk of iodine deficiency (ID) and its complications (1, 2). Iodine supplementation governed by national health care agencies has successfully eliminated or reduced the risk of ID in most countries. Universal salt iodization has been the main strategy, and currently about 70% of households worldwide have access to iodized salt (<http://www.iccid.org>).

It is well documented and accepted that a low iodine intake is associated with a high risk of disease, including brain damage and endemic goiter if the ID is severe (1). It is also documented that a very high iodine intake is associated with endemic goiter and elevated serum TSH (3), indicating impaired thyroid function.

One of the main complications observed after initiation of iodine prophylaxis is iodine-induced hyperthyroidism, which has been reported in many iodine supplementation programs (4, 5). However, little is known about the effect of iodine supplementation to populations with mild to moderate ID on the incidence of overt hypothyroidism.

The iodine intake in Denmark was stable low for many years. The low iodine intake was associated with a high occurrence of nontoxic and toxic goiter in the elderly (6, 7) and signs of insufficient thyroid hormone production in pregnant women who showed increase in TSH in late pregnancy. In 1995, a working group of experts in nutrition and thyroid diseases recommended that the iodine intake in Denmark should be increased by introduction of iodized salt. It was recommended that the iodine fortification (IF) should be cautious and be accompanied by a monitoring program to register the effects and counteract any side effects of the IF program.

Voluntary IF of salt was introduced in Denmark in June 1998. The fortification was initiated with only 8 ppm iodine that could be added to all salt, but after 2 yr, this turned out to be inefficient. In June 2000, IF of household salt and salt for commercial bread production became mandatory, and the iodine content in salt was increased to 13 ppm. Both fortification levels were calculated to increase iodine intake by around  $50 \mu\text{g/d}$  with more than 80% of the salt fortified. It was, however, legal to use stores of unfortified salt.

In this prospective study, we registered all new cases of overt hypothyroidism in two areas of Denmark with previously mild and moderate ID, respectively. The register was started before and included the first 7 yr after introduction of IF of salt. The investigation was part of the Danish investigation of iodine intake and thyroid diseases (8).

First Published Online May 15, 2007

Abbreviations: CI, Confidence interval; ID, iodine deficiency; IF, iodine fortification; RR, rate ratio.

JCEM is published monthly by The Endocrine Society (<http://www.endo-society.org>), the foremost professional society serving the endocrine community.

## Subjects and Methods

The investigation took place from 1997–2005 and comprised four periods: 1) 1997–1998, baseline, was before IF was initiated and lasted 16 months in Aalborg and 14 months in Copenhagen; 2) 1999–2000 with IF on voluntary basis; 3) 2001–2002 with early mandatory IF; and finally 4) 2003–2005 with late mandatory IF. In the period with voluntary IF, the iodized salt was not used by the food industry and it covered only around 50% of household salt. Accordingly, the average increase in iodine intake was low (on average,  $<10 \mu\text{g/d}$ ).

### Population cohorts

Two open population cohorts representing the geographical variation in iodine intake in Denmark were selected for monitoring (9). As a representative of the moderately iodine-deficient western part of Denmark, Aalborg and the surrounding municipalities in Northern Jutland were selected ( $n = 310,124$ ). To represent the mildly iodine-deficient eastern part of Denmark, the geographical area around Bispebjerg Hospital in Copenhagen was chosen ( $n = 225,707$ ). Exact information on the cohorts was provided each year by the Danish Bureau of Statistics. Over the time period of the study, the changes in the age and sex composition of cohorts were negligible.

### Iodine intake of the population

The iodine intake of the population was estimated by two cross-sectional studies and by an investigation of iodine content in bread and salt.

The first cross-sectional study (C1) took place at baseline and comprised 4649 subjects (10). The study confirmed that Aalborg had moderate ID and Copenhagen mild ID with a median iodine concentration in urine of  $45 \mu\text{g/liter}$  and  $61 \mu\text{g/liter}$ , respectively, in subjects taking no mineral supplements. If all subjects were included, the median iodine concentration in urine was moderately higher (Aalborg,  $53 \mu\text{g/liter}$ ; Copenhagen,  $68 \mu\text{g/liter}$ ) (11).

The Danish Institute for Food and Veterinary Research investigated the iodine content in bread and salt sold in Danish stores in 2002 (last year of the early mandatory IF period). Using databases on food consumption in Denmark, it was calculated that the iodine intake had increased about  $60\text{--}65 \mu\text{g/d}$  (12).

The second cross-sectional study (C2) took place in the late mandatory IF period (2004–2005) and comprised 3570 subjects (13). The median urinary iodine excretion had increased to  $86 \mu\text{g/liter}$  (estimated 24-h urinary excretion,  $129 \mu\text{g}$ ) in Aalborg and  $99 \mu\text{g/liter}$  (estimated 24-h urinary excretion,  $149 \mu\text{g}$ ) in Copenhagen [including subjects taking individual iodine supplementation, the figures were  $93 \mu\text{g/liter}$  ( $140 \mu\text{g}/24 \text{ h}$ ) and  $108 \mu\text{g/liter}$  ( $162 \mu\text{g}/24 \text{ h}$ ) respectively].

### Identification of new cases of hypothyroidism

Details on the register and the methodological evaluations performed before the registering was initiated have been described in detail pre-

viously (9). In brief, in Aalborg, there was one and in Copenhagen three laboratories covering all of the respective cohort areas [the laboratory at Aalborg, Frederiksberg, and Bispebjerg Hospitals and the General Practitioners Laboratory in Copenhagen (KPLL)]. Results from measurements of TSH and  $\text{T}_4$  hormones were imported each week from the four laboratory databases into a register database. A filter was made to ensure that only results arising from general practitioners and hospital departments in the study areas were included. The database identified cases of overt hypothyroidism according to the algorithm of high TSH ( $>5.0 \text{ mIU/liter}$ ) combined with a low  $\text{T}_4$  in serum. The  $\text{T}_4$  results were evaluated with respect to the specific laboratory reference ranges (14). A list with possible new cases of hypothyroidism was generated by the database. The list was manually evaluated by searching the laboratory and hospital databases, by rechecking that the patient was living in the cohort area, and furthermore by contact with the patients' general practitioner. About 99% of the Danish population are registered with and consulting one general practitioner only. Cases previously identified by the register database were automatically excluded.

### Laboratory activity

The database continuously accumulated information on the number of TSH and  $\text{T}_4$  measurements that had been performed in the two areas as part of diagnosis and control of thyroid disorders.

### Statistical methods

The 95% confidence intervals (CI) for rate ratios (RR) were calculated after log transformation of the respective rates (15). The calculations were based on an assumption of Poisson distribution of cases. Trend analyses were performed using the  $\chi^2$  test for trend (16). Level of significance was set at 5%.

The study was approved by the regional Ethics Committees in Northern Jutland and Copenhagen and the Danish Data Protection Agency.

## Results

At baseline, the crude incidence rate of hypothyroidism in the entire Aalborg and Copenhagen cohort was  $38.3/100,000\text{-yr}$ . The incidence rate was stable during voluntary IF (*vs.* baseline,  $\text{RR} = 1.14$ ; 95%  $\text{CI} = 0.98\text{--}1.33$ ). During early mandatory IF, the incidence rate of hypothyroidism increased to  $48.7/100,000\text{-yr}$ : early mandatory IF *vs.* baseline,  $\text{RR} = 1.27$ ; 95%  $\text{CI} = 1.10\text{--}1.47$ . Afterward, it seemed to stagnate during late mandatory IF: late mandatory IF *vs.* baseline,  $\text{RR} = 1.23$ ; 95%  $\text{CI} = 1.07\text{--}1.42$  (Fig. 1).

Hypothyroidism was, as expected, more common in females than in males ( $P < 0.001$  in all four periods). In females, the incidence rate of hypothyroidism increased about 20%

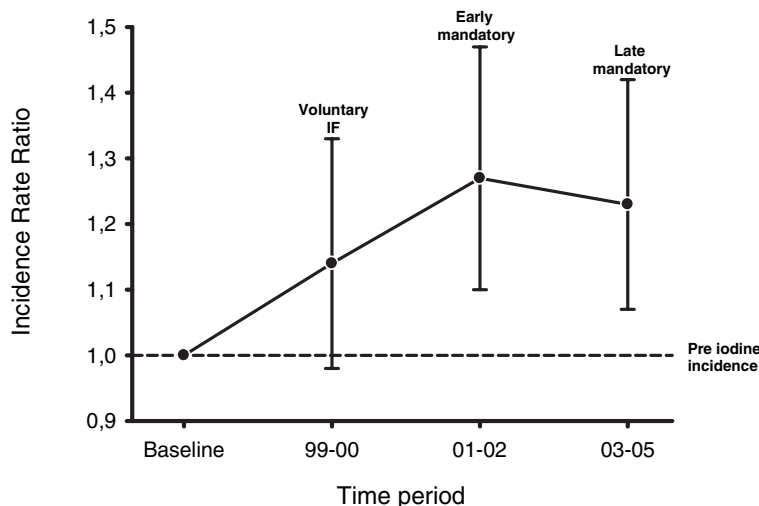

FIG. 1. The incidence RR of hypothyroidism in the total cohort (Aalborg and Copenhagen) in the three periods with different iodine fortification of salt *vs.* baseline, which is the preiodine incidence. The vertical bars indicate the 95% CI to the rate. In the period with voluntary IF, the incidence rate of hypothyroidism was equal to baseline because one was included in the CI. In the following two periods with mandatory IF, the incidence rate of hypothyroidism was significantly higher than baseline.

during the study period (incidence rate at baseline, 60.7/100,000·yr; late mandatory IF, 73.0; RR = 1.20; 95% CI = 1.03–1.41), whereas the increase in males was about 40% (incidence rate at baseline, 14.8/100,000·yr; late mandatory IF, 20.7; RR = 1.40; 95% CI = 1.02–1.92).

The response to increased iodine intake on the incidence rate of hypothyroidism was different in the two subcohorts. In Aalborg, with previous moderate ID, the incidence rate of hypothyroidism was 29.8/100,000·yr at baseline compared with 51.6/100,000·yr in Copenhagen with previous mild ID ( $P < 0.05$ ). In Aalborg, the incidence rate of hypothyroidism was stable during voluntary IF (RR = 1.14; 95% CI = 0.91–1.42) but increased during mandatory IF (early mandatory IF *vs.* baseline, RR = 1.52, 95% CI = 1.23–1.88; late mandatory IF *vs.* baseline, RR = 1.35, 95% CI = 1.11–1.66). In Copenhagen, the incidence rate of hypothyroidism in all three periods with different IF was similar to baseline (Fig. 2).

In the combined cohort (Aalborg and Copenhagen), the incidence rate of hypothyroidism was stable in children and teenagers (age 0–19 yr) and in the elderly (age  $\geq 60$  yr) during the study period. However, in young adults (aged 20–39 yr) and middle-aged (aged 40–59 yr), the incidence rate of hypothyroidism increased significantly during mandatory IF (age group 20–39 yr, early mandatory IF *vs.* baseline, RR = 1.85, 95% CI = 1.22–2.79; late mandatory IF *vs.* baseline, RR = 1.90, 95% CI = 1.28–2.84; age group 40–59 yr, early mandatory *vs.* baseline, RR = 1.53, 95% CI = 1.12–2.10; late mandatory IF *vs.* baseline, RR = 1.81, 95% CI = 1.35–2.42). No obvious difference in pattern was observed between the Aalborg and Copenhagen subcohort (Fig. 3).

The number of thyroid laboratory tests accumulated in the register database increased in both subcohorts during the study period (Table 1) ( $P$  for trend: Aalborg,  $P < 0.001$ ; Copenhagen,  $P < 0.001$ ) with minor differences between areas. During the baseline and voluntary IF period, more TSH levels per 100,000 inhabitants were analyzed in Copenhagen than in Aalborg, whereas the opposite relationship was present in the two periods with mandatory IF (Table 1).

## Discussion

In this prospective epidemiological study of a cohort representative of the Danish population performed before and

FIG. 2. The incidence RR of hypothyroidism in Aalborg (▲) with previous moderate ID and Copenhagen (▼) with previous mild ID in the three periods with different ID compared with baseline, which is the preiodine incidence. The vertical bars indicate the 95% CI to the rate. In Copenhagen, the incidence of hypothyroidism was stable. In Aalborg, however, the incidence rates of hypothyroidism were significantly higher in both periods with mandatory ID compared with baseline because one was not included in the 95% CI.

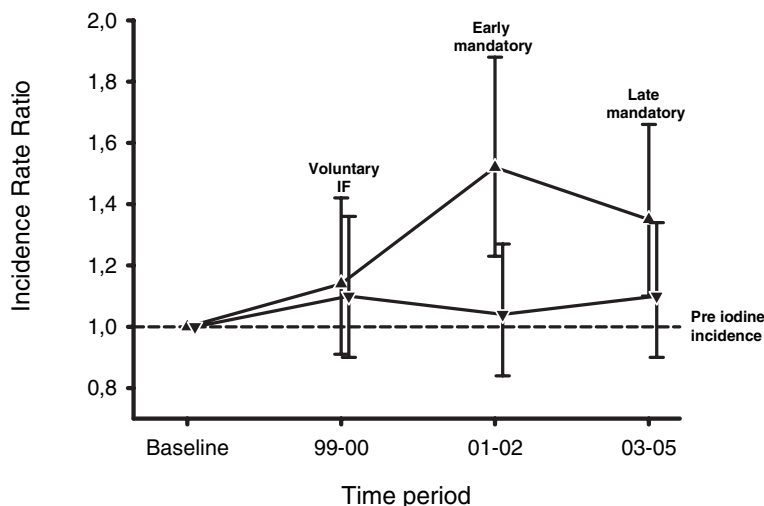

during the first 7 yr of IF of salt in Denmark, we found that the overall incidence rate of hypothyroidism increased significantly during the period of mandatory IF. The increase was restricted to the subcohort with previous moderate ID, whereas the overall incidence of hypothyroidism was stable in the subcohort with previous mild ID. Unexpectedly, the increase in hypothyroidism was observed only in young adults and middle-aged (aged 20–59 yr).

It has been recommended that iodine supplementation should be followed by a monitoring program to register whether any side effects occurred. The focus has so far primarily been on iodine-induced hyperthyroidism (5, 17–19). However, several studies have shown that a high iodine intake may be associated with a higher prevalence of subclinical hypothyroidism in the population (7, 20, 21). This is the first study to study prospectively the effect of an increased iodine intake on the incidence of overt hypothyroidism.

It is difficult to compare results from different epidemiological studies on thyroid dysfunction because different biochemical and epidemiological methods have been applied and because the age and sex composition of the cohorts studied have differed. Genetic factors may in addition to environmental factors influence the results as well.

Small differences or changes in iodine intake may change the pattern of thyroid dysfunction. In the present study, there was only a slight difference in iodine intake between the two subcohorts. However, the incidence rate of hypothyroidism at baseline was significantly higher in Copenhagen (mild ID) than in Aalborg (moderate ID) caused by more cases of autoimmune hypothyroidism (22), whereas the opposite relationship was present for hyperthyroidism (14). This pattern with hyperthyroidism being more common than hypothyroidism has been confirmed in a number of epidemiological studies performed in areas with moderate and mild ID (7, 23, 24). On the contrary, studies from areas with sufficient or more than adequate iodine intake in general found a higher occurrence (prevalence or incidence) of hypothyroidism (subclinical or overt) compared with hyperthyroidism (7, 20, 21, 25–27).

In a 5-yr follow-up study in China including 3761 unsolicited subjects from three regions in China with mild, more

FIG. 3. The incidence RR of hypothyroidism in late mandatory IF period *vs.* baseline in children and teenagers, young adults, middle-aged, and elderly subjects above 59 yr. Results are shown for the Aalborg (▲) and the Copenhagen (▼) subcohort separately. Data from the combined cohort are given in the text. In Copenhagen, no cases of overt hypothyroidism were observed in the 0- to 19-yr age group at baseline, and the RR could not be calculated. The dotted horizontal line indicates the incidence at baseline. Values from late mandatory IF are significantly different from baseline when one is included in the 95% CI.

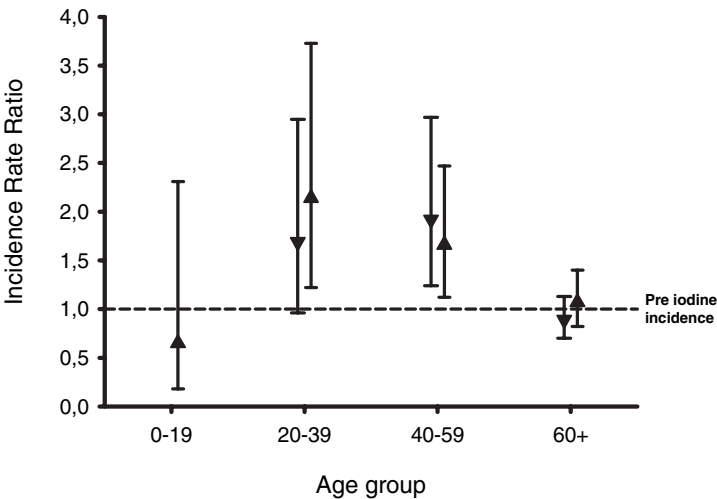

than adequate, and excessive iodine intake, the authors observed a high incidence of subclinical hypothyroidism and autoimmune thyroiditis with high iodine intake (20). There was no increase in overt hypothyroidism, which according to the authors might be related to the short follow-up time and long latency period for hypothyroidism. Moreover, the study cohorts were small for evaluation of overt hypothyroidism, and the number of observations may have been too low to detect an actual increase (type II error).

Despite the IF of salt in Denmark being introduced very cautiously, we registered an increase in the overall incidence of hypothyroidism when the iodine intake level was increased from moderate to mild ID. On the other hand, the overall incidence of hypothyroidism was stable when the iodine intake was increased from mild ID to a low recommended level of iodine intake.

The mechanism behind such an iodine-induced increase on the incidence of hypothyroidism is unknown. Several mechanisms may be involved, and the present results indicate that one or more mechanisms may operate already at a level of iodine intake low enough to give ID-associated disorders.

One possible mechanism could be the well known association between a high thyroidal iodine uptake and inhibition of many thyroidal processes probably via synthesis of iodine containing arachidonic acid derivates (28). It is well established that the autoregulation may be inappropriately high in a number of conditions including autoimmune thyroid disease, subclinical hypothyroidism, and previous surgery on the thyroid or treatment with radioiodine (29). Many

of these conditions are rather common in the population (30, 31). This autoregulation of iodine metabolism within the thyroid gland was probably developed to protect against hyperfunction of the thyroid after a sudden iodine load (29). It could be speculated that the autoregulation might be less effective in elderly subjects compared with young adults and middle-aged.

Another possible mechanism behind iodine-induced hypothyroidism might be enhanced autoimmunity. Several animal studies (32, 33) and a study on lymphocyte infiltration in the human thyroid gland (34) have suggested that an increase from low to normal and high iodine intake is associated with a gradual increase in risk of autoimmune thyroid disease. A number of epidemiological studies in humans have not fully confirmed this association between thyroid autoimmunity and iodine intake. In a comparative study from Jutland (moderate ID) and Iceland (relative high iodine intake), Laurberg *et al.* (7) found the highest prevalence of both thyroid peroxidase and thyroglobulin antibodies in Jutland with the lowest iodine intake. In the United Kingdom, Prentice *et al.* (35), and in Sardinia, Loviselli *et al.* (36) found no relationship between previous and present iodine intake and the presence of thyroid autoantibodies in female blood donors and in schoolchildren, respectively. In a previous comparative cross-sectional study on the prevalence of thyroid autoantibodies we found a similar prevalence of thyroid peroxidase and thyroglobulin antibodies in Aalborg (moderate ID) and Copenhagen (mild ID) (30).

Finally, it could be speculated that a high or excessive iodine intake may lead to impaired thyroid function due to

TABLE 1. Thyroid laboratory tests per 100,000 inhabitants per year from Aalborg (moderate ID) and Copenhagen (mild ID)

|                              | Aalborg  |           |           |           | Copenhagen |           |           |           | Total    |           |           |           |
|------------------------------|----------|-----------|-----------|-----------|------------|-----------|-----------|-----------|----------|-----------|-----------|-----------|
|                              | Baseline | 1999–2000 | 2001–2002 | 2003–2005 | Baseline   | 1999–2000 | 2001–2002 | 2003–2005 | Baseline | 1999–2000 | 2001–2002 | 2003–2005 |
| TSH                          | 19,392   | 23,234    | 26,194    | 28,737    | 22,041     | 24,386    | 24,771    | 25,208    | 20,423   | 23,722    | 25,589    | 27,239    |
| TT <sub>3</sub>              | 9,725    | 12,487    | 12,421    | 12,894    | 7,580      | 7,483     | 7,381     | 6,912     | 8,891    | 10,368    | 10,280    | 10,355    |
| TT <sub>4</sub>              | 11,288   | 12,954    | 12,483    | 12,951    | 7,633      | 7,565     | 7,449     | 6,642     | 9,866    | 10,672    | 10,345    | 10,273    |
| FT <sub>4</sub> <sup>a</sup> | 0        | 0         | 0         | 0         | 2,718      | 2,953     | 2,822     | 3,946     | 1,043    | 1,251     | 1,199     | 1,675     |

Data are the number of thyroid tests performed by the laboratories on subjects living in the two cohorts areas. FT<sub>4</sub>, Free T<sub>4</sub>; TT<sub>3</sub>, total T<sub>3</sub>; TT<sub>4</sub>, total T<sub>4</sub>.

<sup>a</sup> Many Danish laboratories are not using measurements of free T<sub>4</sub> and free T<sub>3</sub> in serum for routine tests due to the insufficient methodology of most commercial methods. In this study, free T<sub>4</sub> was measured in only two of the laboratories in Copenhagen.



increased apoptosis of thyroid follicular cells as found in *in vitro* systems (37).

This study was a prospective follow-up study, and no control group with stable iodine intake was followed in parallel. It is therefore important to consider whether parts of the increase in incidence of hypothyroidism might be caused by other factors than the increased iodine intake. We previously found that the incidence of hyperthyroidism had increased in the years after IF of salt in Denmark (17). When we evaluated the diagnostic activity judged by the number of thyroid tests performed in the two subcohorts, we observed an increase over time. Clearly, some of this increase is linked to the increase in number of patients treated for hypo- and hyperthyroidism (17). However, from the data available, it cannot be excluded that part of the increase in incidence of hypothyroidism is caused by a higher diagnostic alertness.

In the present study, the follow-up time was 7 yr. It is possible that an even longer follow-up time is necessary to clarify the dynamics of the epidemiology of hypothyroidism after a sudden change in iodine intake.

In conclusion, we found that even a cautious iodization of salt resulted in a modest increase in the incidence rate of hypothyroidism. It occurred primarily in young and middle-aged subjects with previous moderate ID. Additional monitoring is necessary to observe the long-term effect of iodine fortification on hypothyroidism.

### Acknowledgments

We are indebted to the general practitioners in Northern Jutland and Copenhagen and to the staff at the Departments of Clinical Biochemistry at Aalborg, Bispebjerg, and Frederiksberg Hospitals and the General Practitioners Laboratory in Copenhagen for extraordinary spirit of collaboration.

Received March 30, 2007. Accepted May 9, 2007.

Address all correspondence and requests for reprints to: Inge Bülöw Pedersen, Department of Endocrinology and Medicine, Aalborg Hospital, Aarhus University Hospital, DK-9000 Aalborg, Denmark. E-mail: I.Bulow@rn.dk.

Disclosure Statement: I.B.P., P.L., N.K., T.J., H.P., and L.B.R. have nothing to declare. L.O. has received lecture fees from DSM Nutritional Products, Spain.

### References

- Hetzel BS, Dunn JT 1989 The iodine deficiency disorders: their nature and prevention. *Ann Rev Nutr* 9:21–38
- Delange F 2000 Iodine deficiency. In: Braverman LE, Utiger RD, eds. *The thyroid*. 8th ed. Philadelphia: Lippincott; 295–316
- Konno N, Makita H, Yuri K, Iizuka N, Kawasaki K 1994 Association between dietary iodine intake and prevalence of subclinical hypothyroidism in the coastal regions of Japan. *J Clin Endocrinol Metab* 78:393–397
- Fradkin J, Wolff J 1983 Iodine-induced thyrotoxicosis. *Medicine* 62:1–21
- Stanbury JB, Ermans AE, Bourdoux P, Todd C, Oken E, Tonglet R, Vidar G, Braverman LE, Medeiros-Neto G 1998 Iodine-induced hyperthyroidism: occurrence and epidemiology. *Thyroid* 8:83–100
- Laurberg P, Pedersen KM, Vestergaard H, Sigurdsson G 1991 High incidence of multinodular toxic goitre in the elderly population in a low iodine intake area vs. high incidence of Graves' disease in the young in a high iodine intake area: comparative surveys of thyrotoxicosis epidemiology in East-Jutland Denmark and Iceland. *J Intern Med* 229:415–420
- Laurberg P, Pedersen KM, Hreidarsson A, Sigfusson N, Iversen E, Knudsen P 1998 Iodine intake and the pattern of thyroid disorders: a comparative epidemiological study of thyroid abnormalities in the elderly in Iceland and in Jutland, Denmark. *J Clin Endocrinol Metab* 83:765–769
- Laurberg P, Jørgensen T, Perrild H, Ovesen L, Bülöw Pedersen I, Rasmussen LB, Carlé A, Vejbjerg P 2006 The Danish investigation on iodine intake and thyroid disease, DanThyr: status and perspectives. *Eur J Endocrinol* 155:219–228
- Bülöw Pedersen I, Laurberg P, Arnfred T, Knudsen N, Jørgensen T, Perrild H, Ovesen L 2002 Surveillance of disease frequency in a population by linkage to diagnostic laboratory databases. A system for monitoring the incidences of hyper- and hypothyroidism as part of the Danish iodine supplementation program. *Comput Methods Programs Biomed* 67:209–216
- Knudsen N, Bülöw I, Jørgensen T, Laurberg P, Ovesen L, Perrild H 2000 Goitre prevalence and thyroid abnormalities at ultrasonography: a comparative epidemiological study in two regions with slightly different iodine status. *Clin Endocrinol (Oxf)* 53:479–485
- Rasmussen LB, Ovesen L, Bülöw I, Jørgensen T, Knudsen N, Laurberg P, Perrild H 2002 Dietary iodine intake and urinary iodine excretion in a Danish population: effect of geography, supplements and food choice. *Br J Nutr* 87:61–69
- Rasmussen LB, Bülöw I, Knudsen N, Perrild H, Jørgensen T, Ovesen L, Laurberg P, Monitoring of the Danish iodine fortification programme. *Proc 18th International Nutrition Congress, Durban, South Africa, 2005*, p 157 (Abstract 6.2)
- Vejbjerg P, Knudsen N, Perrild H, Carlé A, Laurberg P, Bülöw Pedersen I, Rasmussen LB, Ovesen L, Jørgensen T 2007 Effect of a mandatory iodization program on thyroid gland volume based on individuals' age, gender, and preceding severity of dietary iodine deficiency: a prospective, population-based study. *J Clin Endocrinol Metab* 92:1397–1401
- Bülöw Pedersen I, Knudsen N, Jørgensen T, Perrild H, Ovesen L, Laurberg P 2002 Large differences in incidences of overt hyper- and hypothyroidism associated with a small difference in iodine intake; a prospective comparative register-based population survey. *J Clin Endocrinol Metab* 87:4462–4469
- Clayton D, Hills M 1993 *Statistical models in epidemiology*. New York: Oxford University Press; 138–139
- Kirkwood B 1988 *Essentials of medical statistics*. Oxford, UK: Blackwell Science; 102–104
- Bülöw Pedersen I, Laurberg P, Knudsen N, Jørgensen T, Perrild H, Ovesen L, Rasmussen LB 2006 Increase in incidence of hyperthyroidism predominantly occurs in young people after iodine fortification of salt in Denmark. *J Clin Endocrinol Metab* 91:3830–3834
- Connolly RJ 1971 An increase in thyrotoxicosis in southern Tasmania after an increase in dietary iodine. *Med J Austral* 12:1268–1271
- Connolly RJ, Vidar GI, Stewart JC 1970 Increase in thyrotoxicosis in endemic goitre area after iodation of bread. *Lancet* 1:500–502
- Teng W, Shan Z, Teng X, Guan H, Li Y, Teng D, Jin Y, Yu X, Fan C, Chong W, Yang F, Dai H, Yu Y, Li J, Chen Y, Zhao D, Shi X, Hu F, Mao J, Gu X, Yang R, Tong Y, Wang W, Gao T, Li C 2006 Effect of iodine intake on thyroid diseases in China. *N Engl J Med* 354:2783–2793
- Parle JV, Franklyn JA, Cross KW, Jones SC, Sheppard MC 1991 Prevalence and follow-up of abnormal thyrotrophin (TSH) concentrations in the elderly in the United Kingdom. *Clin Endocrinol (Oxf)* 34:77–83
- Carlé A, Laurberg P, Bülöw Pedersen I, Knudsen N, Perrild H, Ovesen L, Rasmussen LB, Jørgensen T 2006 Epidemiology of subtypes of hypothyroidism in Denmark. *Eur J Endocrinol* 154:21–28
- Aghini-Lombardi F, Antonangeli L, Martino E, Vitti P, Maccherini D, Leoli F, Rago T, Grasso L, Valeriano R, Balestrieri A, Pinchera A 1999 The spectrum of thyroid disorders in an iodine-deficient community: The Pescopagano survey. *J Clin Endocrinol Metab* 84:561–566
- Hintze G, Burghardt U, Baumert J, Windeler J, Köbberling J 1991 Prevalence of thyroid dysfunction in elderly subjects from the general population in an iodine deficiency area. *Aging* 3:325–331
- Flynn RWV, MacDonald TM, Morris AD, Jung RT, Leese GP 2004 The thyroid epidemiology, audit, and research study: thyroid dysfunction in the general population. *J Clin Endocrinol Metab* 89:3879–3884
- Hollowell JG, Staehling NW, Flanders WD, Hannon WH, Gunter EW, Spencer CA, Braverman LE 2002 Serum TSH, T<sub>4</sub>, and thyroid antibodies in the United States population (1988 to 1994): national health and nutrition examination survey (NHANES III). *J Clin Endocrinol Metab* 87:489–499
- Vanderpump MPJ, Tunbridge WMG, French JM, Appleton D, Bates D, Clark F, Evans JG, Hasan DM, Rodgers H, Tunbridge F, Young ET 1995 The incidence of thyroid disorders in the community: a twenty-year follow-up of the Whickham Survey. *Clin Endocrinol (Oxf)* 43:55–68
- Pisarev MA, Gärtner R 2000 Autoregulatory actions of iodine. In: Braverman LE, Utiger RD, eds. *The thyroid*. 8th ed. Philadelphia: Lippincott; 85–90
- Roti E, Vagenakis AG 2000 Effect of excess iodide: clinical aspects. In: Braverman LE, Utiger RD, eds. *The thyroid*. 8th ed. Philadelphia: Lippincott; 316–329
- Pedersen IB, Knudsen N, Jørgensen T, Perrild H, Ovesen L, Laurberg P 2003 Thyroid peroxidase and thyroglobulin autoantibodies in a large survey of populations with mild and moderate iodine deficiency. *Clin Endocrinol (Oxf)* 58:36–42
- Knudsen N, Bülöw I, Jørgensen T, Laurberg P, Ovesen L, Perrild H 2000 Comparative study of thyroid function and types of thyroid dysfunction in two areas in Denmark with slightly different iodine status. *Eur J Endocrinol* 143:485–491
- Safran M, Paul TL, Roti E, Braverman LE 1987 Environmental factors affecting autoimmune thyroid disease. *Endocrinol Metab Clin North Am* 16:327–342
- Sundick R, Bagchi N, Brown TR 1992 The role of iodine in thyroid autoimmunity: from chickens to humans. A review. *Autoimmunity* 13:61–68

34. Harach HR, Williams ED 1995 Thyroid cancer and thyroiditis in the goitrous region of Salta, Argentina, before and after iodine prophylaxis. *Clin Endocrinol (Oxf)* 43:701–706
35. Prentice LM, Phillips DIW, Sarsero D, Beever K, McLachlan SM, Smith BR 1990 Geographical distribution of subclinical autoimmune disease in Britain: a study using highly sensitive direct assays for autoantibodies to thyroglobulin and thyroid peroxidase. *Acta Endocrinol (Copenh)* 123:493–498
36. Loviselli A, Velluzzi F, Mossa P, Cambosu MA, Secci G, Atzeni F, Taberlet A, Balestrieri A, Martino E, Grasso L, Songini M, Bottazzo GF, Mariotti S 2001 The Sardinian autoimmunity study. 3. Studies on circulating antithyroid antibodies in Sardinian schoolchildren: relationship to goiter prevalence and thyroid function. *Thyroid* 11:849–857
37. Langer R, Burzler C, Bechtner G, Gärtner R 2003 Influence of iodide and iodolactones on thyroid apoptosis. Evidence that apoptosis induced by iodide is mediated by iodolactones in intact porcine thyroid follicles. *Exp Clin Endocrinol* 111:325–329

JCEM is published monthly by The Endocrine Society (<http://www.endo-society.org>), the foremost professional society serving the endocrine community.
